# Supplementary material for: Can the SARS-CoV-2 Spike Protein Bind Integrins Independent of the RGD Sequence?
Source: Front Cell Infect Microbiol. 2021 Nov 18;11:765300. doi: 10.3389/fcimb.2021.765300 (PMC8637727; doi:10.3389/fcimb.2021.765300)
Supplement: Supplementary file 1 [file DataSheet_1.xlsx]

## Sheet: Table_S1
Lung and colon transcriptome profiling of fatal COVID-19 cases
https://www.ebi.ac.uk/gxa/experiments/E-ENAD-46/Results?specific=true&geneQuery=%255B%255D&filterFactors=%257B%257D&cutoff=%257B%2522foldChange%2522%253A1%252C%2522pValue%2522%253A0.05%257D&regulation=%2522UP_DOWN%2522
Gene ID	Gene Name	colon_foldChange	colon_pValue	lung_foldChange
ENSG00000213949	ITGA1	1.4	5.26264e-06
ENSG00000164171	ITGA2			1.2
ENSG00000005884	ITGA3	-1.1	0.00903136
ENSG00000115232	ITGA4	-1.2	0.00965084
ENSG00000135424	ITGA7			1.8
ENSG00000156886	ITGAD	-2.4	0.0223646	-3.7
ENSG00000169896	ITGAM			1.3
ENSG00000138448	ITGAV	1.2	9.21219e-05	1.3
ENSG00000150093	ITGB1	1.1	0.00431928
ENSG00000229656	ITGB1-DT	-2.2	0.0257057
ENSG00000160255	ITGB2			1.1
ENSG00000227039	ITGB2-AS1	-4.4	8.7572e-06
ENSG00000132470	ITGB4	-1.4	8.42575e-06
ENSG00000139626	ITGB7	-4.9	1.31749e-09	-2.9
ENSG00000105855	ITGB8			1.2
Primary Human Airway Epithelial Cultures infected with SARS-CoV-2
https://www.ebi.ac.uk/gxa/experiments/E-GEOD-153970/Results
ENSG00000105855	ITGB8	1.1	3.74176e-11
Spectrum of Viral Load and Host Response Seen in Autopsies of SARS-CoV-2 Infected Lungs
https://www.ebi.ac.uk/gxa/experiments/E-GEOD-150316/Results?specific=true&geneQuery=%255B%255D&filterFactors=%257B%257D&cutoff=%257B%2522foldChange%2522%253A1%252C%2522pValue%2522%253A0.05%257D&regulation=%2522UP_DOWN%2522
ENSG00000160255	ITGB2	1.2	0.0389616

## Sheet: Table_S2
Integrin-binding motif	Binding integrin(s) (weaker binding)	Reference
RGD	α5β1,α8β1,αvβ1,αvβ3, αvβ5, αvβ6, αvβ8, αIIbβ3, (α2β1), (α3β1), (α4β1), (α7β1)	https://pubmed.ncbi.nlm.nih.gov/8970741/
KQAGDV	αIIbβ3, (α5β1)	https://pubmed.ncbi.nlm.nih.gov/8970741/
LDS	α4β1, (α5β1)	https://pubmed.ncbi.nlm.nih.gov/8970741/
IDS	α4β1, (α5β1)	https://pubmed.ncbi.nlm.nih.gov/8970741/
RLD/KRLDGS	αvβ3, αMβ2	https://pubmed.ncbi.nlm.nih.gov/8970741/
LET	αLβ2	https://pubmed.ncbi.nlm.nih.gov/19153605/
IET	αLβ2	https://pubmed.ncbi.nlm.nih.gov/19153605/
YYGDLR	α2β1	https://pubmed.ncbi.nlm.nih.gov/8970741/
FYFDLR	α2β1	https://pubmed.ncbi.nlm.nih.gov/8970741/
HHLGGAKQAGDV	αIIbβ3	https://pubmed.ncbi.nlm.nih.gov/1573842/
GLOGEN	α1β1	https://pubmed.ncbi.nlm.nih.gov/22654115/
GVOGEA	α1β1	https://pubmed.ncbi.nlm.nih.gov/22654115/
GFPGER	α1β1	https://pubmed.ncbi.nlm.nih.gov/22654115/
GFOGER	α1β1	https://pubmed.ncbi.nlm.nih.gov/22654115/
GFPGEN	α2β1	https://pubmed.ncbi.nlm.nih.gov/16326707/
PHSCN	αvβ1,αvβ3	https://pubmed.ncbi.nlm.nih.gov/16705310/
KGE	β1	https://pubmed.ncbi.nlm.nih.gov/29246902/
YGL	α4β1,α4β7,α9β1	https://pubmed.ncbi.nlm.nih.gov/16298987/
DGEA	α2β1	https://pubmed.ncbi.nlm.nih.gov/12941907/
GPRP	αxβ2	https://pubmed.ncbi.nlm.nih.gov/12941907/
DLXXL/DLD	α2β1, α6β1	https://pubmed.ncbi.nlm.nih.gov/9890954/
NVR	α3β1	https://pubmed.ncbi.nlm.nih.gov/15494436/
NGR	α3β1	https://pubmed.ncbi.nlm.nih.gov/15494436/
REDV	fibronectin-like binding	https://pubmed.ncbi.nlm.nih.gov/3025221/
YIGSR	Laminin-binding integrins	https://pubmed.ncbi.nlm.nih.gov/2961059/
YIGSE	Laminin-binding integrins	https://pubmed.ncbi.nlm.nih.gov/2961059/
DRDE	fibronectin-like binding	https://pubmed.ncbi.nlm.nih.gov/3025221/
SRYD	fibronectin-like binding	https://pubmed.ncbi.nlm.nih.gov/1629196/
R/KTS	α1β1	https://pubmed.ncbi.nlm.nih.gov/15556632/
GRKRK	αvβ3	https://pubmed.ncbi.nlm.nih.gov/15134831/
CRRETAWAC	α5β1	https://pubmed.ncbi.nlm.nih.gov/7507494/
AEIDGIEL	α9b1	https://pubmed.ncbi.nlm.nih.gov/10801897/
IDAPS	α4b1	https://pubmed.ncbi.nlm.nih.gov/10801897/
MLD	α4β1, α9β1, α7β4	https://pubmed.ncbi.nlm.nih.gov/14769041/
AGDLV	αvβ6	https://pubmed.ncbi.nlm.nih.gov/9890954/
ASDIS	αvβ6	https://pubmed.ncbi.nlm.nih.gov/9890954/
GDLDL	αvβ6	https://pubmed.ncbi.nlm.nih.gov/9890954/
GDLHS	αvβ6	https://pubmed.ncbi.nlm.nih.gov/9890954/
GRFPF	αvβ3	https://pubmed.ncbi.nlm.nih.gov/9890954/
GRIFH	αvβ3	https://pubmed.ncbi.nlm.nih.gov/9890954/
GRMPF	αvβ3	https://pubmed.ncbi.nlm.nih.gov/9890954/
HHELD	αvβ6	https://pubmed.ncbi.nlm.nih.gov/9890954/
HPRTD	αvβ6	https://pubmed.ncbi.nlm.nih.gov/9890954/
KGDLA	αvβ6	https://pubmed.ncbi.nlm.nih.gov/9890954/
NGRLD	αvβ3	https://pubmed.ncbi.nlm.nih.gov/9890954/
QRSDL	αvβ6	https://pubmed.ncbi.nlm.nih.gov/9890954/
QSGDL	αvβ6	https://pubmed.ncbi.nlm.nih.gov/9890954/
RDDLH	αvβ6	https://pubmed.ncbi.nlm.nih.gov/9890954/
RDDLQ	αvβ6	https://pubmed.ncbi.nlm.nih.gov/9890954/
RDFQY	αvβ6	https://pubmed.ncbi.nlm.nih.gov/9890954/
RDLET	αvβ6	https://pubmed.ncbi.nlm.nih.gov/9890954/
RHDLS	αvβ6	https://pubmed.ncbi.nlm.nih.gov/9890954/
RSDLD	αvβ6	https://pubmed.ncbi.nlm.nih.gov/9890954/
RSDLT	αvβ6	https://pubmed.ncbi.nlm.nih.gov/9890954/
RTDLD	αvβ6	https://pubmed.ncbi.nlm.nih.gov/9890954/
RTDLH	αvβ6	https://pubmed.ncbi.nlm.nih.gov/9890954/
RTDLS	αvβ6	https://pubmed.ncbi.nlm.nih.gov/9890954/
RTDLY	αvβ6	https://pubmed.ncbi.nlm.nih.gov/9890954/
SSDLH	αvβ6	https://pubmed.ncbi.nlm.nih.gov/9890954/
TSDLE	αvβ6	https://pubmed.ncbi.nlm.nih.gov/9890954/
VSDVY	αvβ6	https://pubmed.ncbi.nlm.nih.gov/9890954/
VTDLQ	αvβ6	https://pubmed.ncbi.nlm.nih.gov/9890954/
SFFAR	αvβ3	https://pubmed.ncbi.nlm.nih.gov/10967329/
VVISY	β5	https://pubmed.ncbi.nlm.nih.gov/12769841/
DEDEG	αMβ2	https://pubmed.ncbi.nlm.nih.gov/12824186/
GFPGE	α2β1	https://pubmed.ncbi.nlm.nih.gov/9837901/
VPW	αIIbβ3	https://pubmed.ncbi.nlm.nih.gov/15946218/
CPCFL	β2	https://pubmed.ncbi.nlm.nih.gov/11381078/
LLG	β2	https://pubmed.ncbi.nlm.nih.gov/11381078/
WGD	α5β1, αVβ3, αIIbβ3	https://pubmed.ncbi.nlm.nih.gov/22778902/
VGD	α5β1	https://pubmed.ncbi.nlm.nih.gov/22778902/
MGD	α5β1	https://pubmed.ncbi.nlm.nih.gov/22778902/

## Sheet: Table_S3
			DSSP solvent accessibility for CABSFLEX models
AA #	Residue	CABS-Flex2_RMSF	Average	Std.Dev.	Reference	Model1	Model2	Model3	Model4	Model5	Model6	Model7	Model8	Model9	Model10
354	N	0.306	63.1818	15.581	62	59	38	80	70	79	65	33	65	70	74
355	R	0.495	119.182	32.1733	130	126	73	109	149	125	128	63	64	140	204
356	K	0.457	62.2727	27.5118	47	69	82	76	9	62	31	105	62	80	62
357	R	0.433	162.455	18.9763	164	162	165	158	163	149	196	123	147	142	218
358	I	0.661	6.81818	10.5562	26	2	2	28	4	1	2	1	4	1	4
	average	0.4704	82.7818
403	R	0.244	49.0909	25.7831	24	50	93	74	31	63	32	76	26	22	49
404	G	0.496	4.18182	3.80789	6	5	6	0	0	11	9	0	5	3	1
405	D	1.015	87.2727	33.0057	27	112	94	33	93	84	119	72	122	98	106
	average	0.585	46.8485
441	L	1.145	74	15.1983	91	41	70	67	69	85	93	64	70	79	85
442	D	0.901	3.18182	3.52924	7	5	7	0	7	0	0	0	0	7	2
443	S	1.061	14.6364	12.3216	10	4	25	4	29	0	0	31	24	9	25
	average	1.03567	30.6061
444	K	1.422	154.455	29.5193	102	148	181	110	175	132	159	181	174	173	164
445	V	2.444	61.5455	33.2826	79	21	39	107	27	65	121	41	73	49	55
446	G	2.677	42.7273	16.2375	61	59	50	5	51	50	48	42	30	45	29
447	G	1.715	46.4545	20.3199	14	47	43	76	52	47	8	53	62	41	68
	average	2.0645	76.2955
457	R	0.923	110.727	34.9787	39	106	125	154	147	139	122	109	88	79	110
458	K	1.395	46.9091	43.8737	120	1	18	105	11	24	37	28	65	104	3
459	S	1.791	59.4545	19.1975	88	51	72	33	79	81	78	52	59	38	23
460	N	1.769	89.8182	28.4691	86	56	78	72	115	69	75	92	131	142	72
461	L	1.696	17	22.353	5	3	27	74	28	23	0	9	8	2	8
462	K	2.044	106.364	25.0324	138	88	105	67	98	126	113	68	135	104	128
	average	1.603	71.7121
465	E	1.369	73.6364	22.4856	56	94	70	77	32	46	69	105	75	92	94
466	R	0.719	65.0909	33.45	117	55	67	55	53	58	36	105	89	2	79
467	D	1.614	77.6364	25.4855	25	73	96	42	99	64	74	107	85	73	116
468	I	1.052	89.8182	18.0373	94	89	82	111	58	117	72	106	85	83	91
469	S	1.177	32.2727	15.7141	68	11	27	27	37	36	25	45	29	19	31
470	T	1.2	83.5455	17.3849	42	83	66	73	88	86	91	97	90	101	102
471	E	1.121	58.4545	26.2628	88	78	71	51	59	28	87	46	101	23	11
472	I	1.579	82.8182	30.7903	35	93	114	93	75	78	45	39	108	116	115
	average	1.22887	70.4091
477	S	3.781	66.4545	32.1586	84	92	61	116	63	53	26	73	4	50	109
478	T	3.463	32.0909	14.5377	51	28	42	15	33	35	62	19	23	39	6
479	P	4.31	67.0909	26.5667	93	52	77	29	77	92	42	96	28	81	71
480	C	5.214	85.7273	43.9343	30	58	132	23	131	63	114	47	114	128	103
481	N	5.382	110.455	40.2885	130	162	36	114	49	94	130	113	140	137	110
	average	4.43	72.3636
482	G	5.923	57.3636	22.0154	29	63	85	41	83	44	72	22	69	65	58
483	V	5.478	91.3636	33.2407	102	59	44	132	118	108	46	103	133	100	60
484	E	5.236	131.273	45.4821	175	162	129	124	59	196	136	175	70	106	112
485	G	4.536	59.8182	23.0278	14	73	68	81	73	48	29	71	47	81	73
486	F	3.377	122.545	28.4185	164	88	115	103	102	103	154	146	136	84	153
487	N	2.611	94.2727	28.0642	70	126	53	125	90	93	118	142	98	79	43
	average	4.47842	82.5682
490	F	0.749	75.0909	34.6489	105	111	110	91	100	49	10	44	94	57	55
491	P	0.568	39.6364	18.9549	0	19	51	51	54	37	24	50	42	60	48
492	L	0.396	74.8182	25.2369	15	92	105	58	86	70	67	80	69	95	86
	average	0.571	63.1818
495	Y	0.454	15.5455	16.6229	3	7	6	55	21	25	15	8	1	0	30
496	G	0.445	21.7273	5.05085	17	21	18	21	25	24	17	24	34	21	17
497	F	0.369	38.5455	27.9356	0	58	5	7	28	14	69	47	64	66	66
	average	0.422667	25.2727
502	G	3.987	78.0909	15.8899	39	91	90	74	90	81	86	90	74	71	73
503	V	2.795	72.4545	15.2056	87	76	62	83	82	103	73	54	63	58	56
504	G	2.045	49.7273	14.9996	17	65	35	58	34	51	54	63	50	54	66
505	Y	0.853	103.455	15.9962	99	117	90	117	106	123	85	100	101	71	129
506	Q	0.608	67.9091	33.9288	19	96	91	77	21	112	91	26	75	77	62
507	P	0.419	1.09091	1.1547	0	1	1	1	4	1	0	0	1	1	2
508	Y	0.207	15.9091	11.5393	30	2	26	18	0	20	20	28	12	0	19
GVG	average	2.94233	66.7576
VGY	average	1.89767	75.2121
VGYQPY	average	0.8264	47.6182
	total average:	1.83635	65.7048
